# Supplementary material for: Preparation and gas transport properties of triptycene-containing polybenzoxazole (PBO)-based polymers derived from thermal rearrangement (TR) and thermal cyclodehydration (TC) processes
Source: Royal Society of Chemistry journal article supplement (doi:10.1039/c6ta03951k), 2016-01-01
Supplement: c6ta03951k1.pdf [file c6ta03951k1.pdf]

*Supporting Information for*

**Preparation and Gas Transport Properties of Triptycene-containing  
Polybenzoxazole (PBO)-based Polymers Derived from Thermal  
Rearrangement (TR) and Thermal Cyclodehydration (TC) Processes**

Shuangjiang Luo,<sup>†</sup> Junyi Liu,<sup>‡</sup> Haiqing Lin,<sup>‡</sup> Barbara Kazanowska,<sup>†</sup> Michael D. Hunckler,<sup>§</sup>  
Ryan K. Roeder,<sup>§</sup> Ruilan Guo<sup>†\*</sup>

<sup>†</sup>*Department of Chemical and Biomolecular Engineering, University of Notre Dame, Notre Dame, IN 46556, USA*

<sup>‡</sup>*Department of Chemical and Biological Engineering, University of Buffalo, The State University of New York, Buffalo, NY 14260, USA*

<sup>§</sup>*Department of Aerospace and Mechanical Engineering, University of Notre Dame, Notre Dame, IN 46556, USA*

**\*Corresponding Author**

Telephone: +1-574-631-3453 Fax: +1-574-631-8366 E-mail: rguo@nd.edu

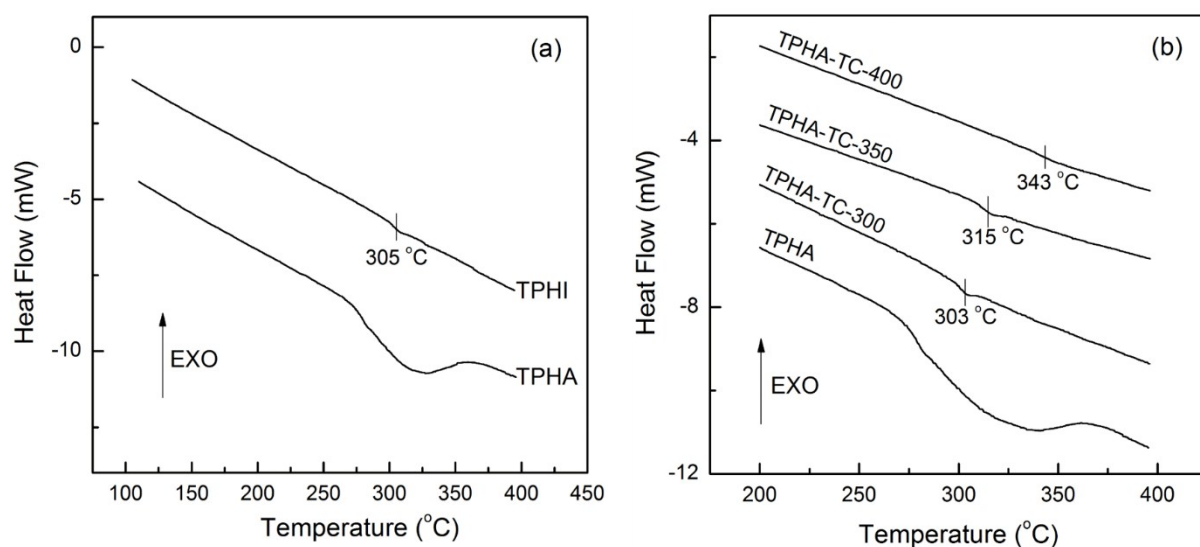

**Figure S1.** DSC thermograms for (a) triptycene-containing TPDAn-6FAP-TPHI and TPDC-6FAP-TPHA precursors; (b) TPHA precursor and resulting PBOs obtained at different TC temperatures. All curves shown were obtained in the second heating cycle.

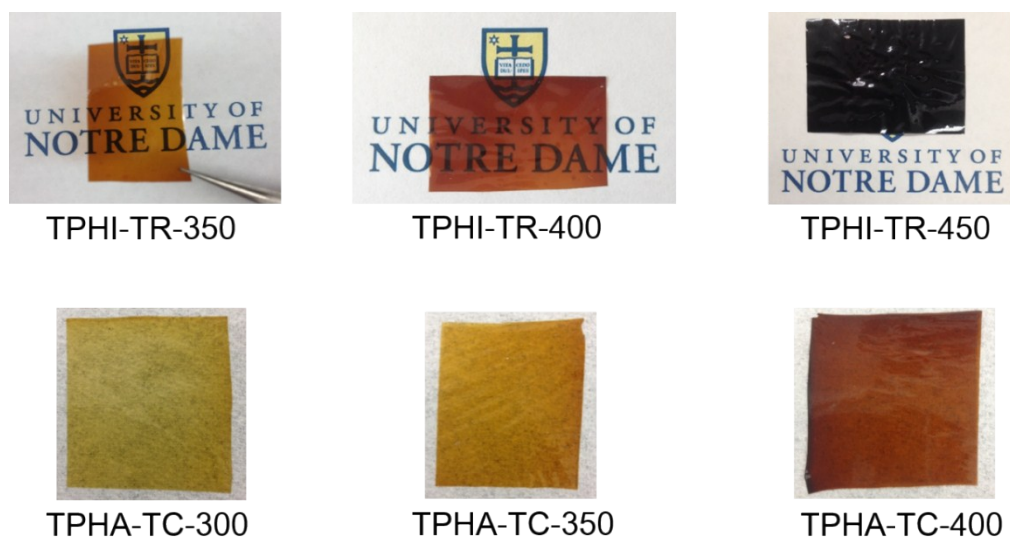

**Figure S2.** Photographs of the thermally treated films.

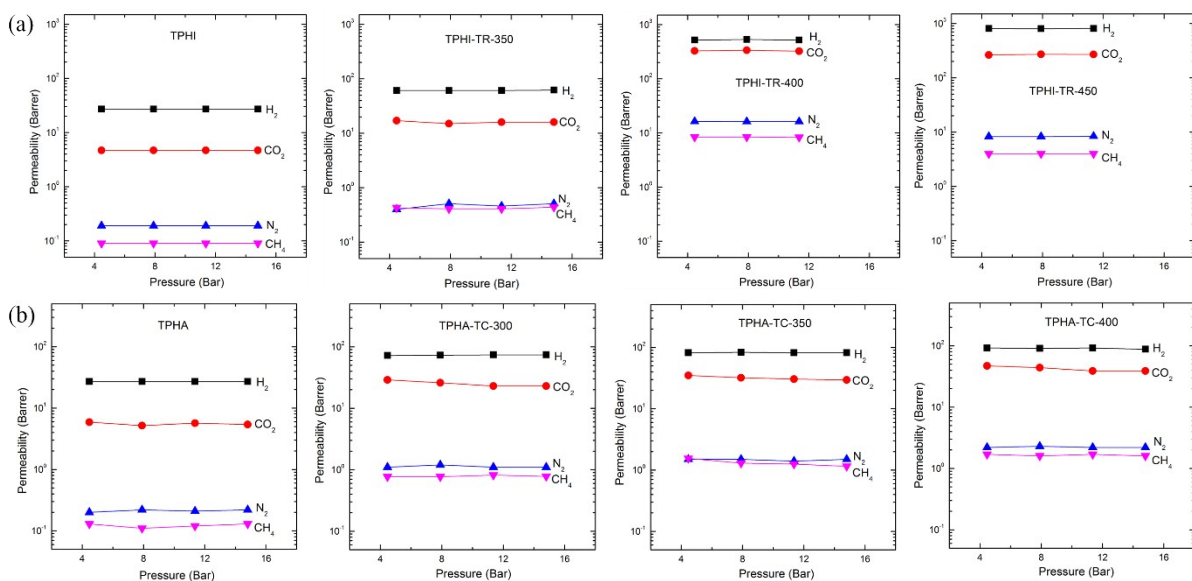

**Figure S3.** Pure gas permeabilities of (a) TPHI-TR and (b) TPHA-TC membranes as a function of feed pressure.
